## **Role of procalcitonin in chronic kidney diseases patients undergoing renal therapy**

**Abdul Ghaffar Khan<sup>1</sup>, Nosheen Akhtar<sup>2</sup>, Zartasha Tariq<sup>1</sup>, Muhammad Arif<sup>3</sup>**

1. Holy Family Hospital, Rawalpindi
2. Services Hospital, Lahore
3. Lahore General Hospital, Lahore

Corresponding Author: Abdul Ghaffar Khan, Holy Family Hospital, Rawalpindi.

medRxiv has withdrawn this preprint owing to plagiarism. Therefore, this work should not be cited as a reference for this project.
